# Supplementary material
Source: ML conference proceedings conference paper supplement (https://proceedings.neurips.cc/paper_files/paper/2021/hash/df42e2244c97a0d80d565ae8176d3351-Abstract.html)
Supplement: Supplementary file 1 [file df42e2244c97a0d80d565ae8176d3351-Supplemental.pdf]

## Additional results

Table 1: Comparing averages directly over 53 Atari-2600 games, as no confidence interval or standard deviation data is provided for the results of  $\pi$ -IW(1),  $\pi$ -IW(1)+,  $\pi$ -HIW(n, 1). The highest average score is highlighted in green. Freeway is excluded from this table as Junyent et al. [1] do not report the results for it due to its slow simulator time. See Table 2 for the Freeway results of  $RIW_D$ ,  $RIW_C$ ,  $N-CPL_D$ , and  $N-CPL$ .

| GAME                    | $RIW_D$     | $RIW_C$    | CPL               | $N-CPL_D$        | N-CPL            | $\pi$ -IW         | $\pi$ -IW+        | $\pi$ -HIW(n,1)   |
|-------------------------|-------------|------------|-------------------|------------------|------------------|-------------------|-------------------|-------------------|
| Alien                   | 4,365.20    | 4,478.40   | 6,209.00          | <b>7,640.60</b>  | 6,943.40         | 3,969.78          | 2,585.77          | 4,609.18          |
| Amidar                  | 1,014.84    | 897.00     | 1,433.68          | <b>2,404.60</b>  | 2,118.32         | 950.45            | 374.20            | 1,076.17          |
| Assault                 | 764.80      | 768.00     | <b>3,222.98</b>   | 3,185.44         | 3,079.92         | 1,574.91          | 922.30            | 2,344.28          |
| Asterix                 | 52,940.00   | 54,090.00  | 39,860.00         | 48,364.00        | 48,226.00        | <b>346,409.11</b> | 247,063.36        | 90,017.25         |
| Asteroids               | 1,480.20    | 1,397.20   | 6,145.20          | 9,000.80         | <b>9,152.80</b>  | 1,368.55          | 1,490.87          | 990.95            |
| Atlantis                | 48,930.00   | 46,464.00  | <b>173,786.00</b> | 120,650.00       | 119,636.00       | 106,212.63        | 143,177.73        | 17,539.22         |
| BankHeist               | 453.46      | 436.90     | 336.40            | <b>957.12</b>    | 709.00           | 567.16            | 256.29            | 501.68            |
| BattleZone              | 102,780.00  | 88,560.00  | 220,680.00        | 165,340.00       | 153,880.00       | 69,659.40         | 30,848.95         | <b>309,137.79</b> |
| BeamRider               | 4,124.37    | 3,521.80   | 6,164.64          | 3,743.80         | 3,560.88         | 3,313.11          | 8,428.96          | <b>11,931.41</b>  |
| Berzerk                 | 600.00      | 620.00     | 3,148.00          | 4,642.20         | 4,120.60         | 1,548.23          | 960.03            | <b>7,417.26</b>   |
| Bowling                 | 65.38       | 63.10      | <b>161.06</b>     | 101.40           | 103.24           | 26.28             | 78.18             | 50.09             |
| Boxing                  | 52.44       | 54.58      | 80.96             | 84.30            | 86.40            | <b>99.88</b>      | 88.19             | 6.81              |
| Breakout                | 64.34       | 53.36      | 197.82            | <b>320.64</b>    | 302.04           | 92.07             | 107.64            | 252.88            |
| Centipede               | 52,685.12   | 55,495.78  | 53,608.80         | 60,157.38        | 62,654.16        | 126,488.35        | <b>141,070.19</b> | 80,685.48         |
| ChopperCommand          | 3,768.00    | 3,466.00   | 17,908.00         | 4,570.00         | 3,786.00         | 11,187.44         | 3,431.74          | <b>70,787.12</b>  |
| CrazyClimber            | 40,520.00   | 39,387.50  | 78,266.00         | 90,332.00        | 91,912.00        | <b>161,192.01</b> | 138,648.58        | 102,205.99        |
| DemonAttack             | 8,499.88    | 8,449.00   | 10,560.00         | 10,829.90        | 10,876.00        | 26,881.13         | <b>35,022.64</b>  | 16,007.64         |
| DoubleDunk              | 6.72        | 6.00       | 19.76             | 23.76            | <b>23.96</b>     | 4.68              | -16.80            | 3.51              |
| Enduro                  | 1.90        | 1.34       | 231.44            | 250.88           | 220.28           | <b>506.59</b>     | 63.83             | 44.47             |
| FishingDerby            | -67.76      | -62.46     | -23.94            | -29.22           | -7.62            | <b>8.89</b>       | -28.02            | -53.76            |
| Frostbite               | 280.00      | 273.80     | <b>9,956.80</b>   | 5,255.60         | 6,508.00         | 270.00            | 1,636.51          | 7,242.60          |
| Gopher                  | 6,311.43    | 5,990.83   | 11,181.60         | 13,326.40        | 12,539.60        | <b>18,025.91</b>  | 7,061.76          | 15,001.18         |
| Gravitar                | 1,755.00    | 1,725.00   | <b>2,382.00</b>   | 2,246.00         | 2,284.00         | 1,876.80          | 1,532.33          | 1,154.01          |
| Hero                    | 17,438.30   | 17,159.70  | 29,200.40         | 34,083.40        | 36,099.80        | <b>36,443.73</b>  | 22,097.39         | 36,231.21         |
| IceHockey               | 21.48       | 21.92      | 19.62             | <b>29.58</b>     | 26.96            | -9.66             | -4.02             | -2.36             |
| Jamesbond               | 2,378.00    | 2,485.00   | 18,666.00         | 17,572.00        | <b>18,790.00</b> | 43.20             | 104.91            | 1,380.13          |
| Kangaroo                | 1,556.00    | 1,504.00   | 5,332.00          | <b>9,222.00</b>  | 9,202.00         | 1,847.46          | 2,918.98          | 6,861.57          |
| Krull                   | 2,176.58    | 2,127.60   | 5,631.22          | 4,900.90         | 4,422.88         | 8,343.30          | <b>13,014.77</b>  | 4,121.81          |
| KungFuMaster            | 5,668.00    | 5,886.00   | 27,288.00         | <b>43,520.00</b> | 42,388.00        | 41,609.03         | 24,871.94         | 20,680.65         |
| MontezumaRevenge        | 0.00        | 0.00       | 2.00              | 0.00             | 0.00             | 0.00              | 810.49            | <b>5,275.89</b>   |
| MsPacman                | 15,697.56   | 15,729.28  | 11,922.22         | 16,150.08        | <b>18,285.18</b> | 14,726.33         | 5,916.86          | 4,523.47          |
| NameThisGame            | 6,247.50    | 6,145.25   | 8,287.40          | 8,017.20         | 8,339.40         | 12,734.85         | <b>18,167.55</b>  | 9,977.12          |
| Phoenix                 | 4,992.80    | 4,912.60   | 6,616.40          | 8,033.40         | <b>8,777.40</b>  | 5,905.12          | 7,647.67          | 7,508.63          |
| Pitfall                 | -44.86      | -62.66     | -0.48             | -1.68            | <b>-0.42</b>     | -214.75           | -2.46             | -128.82           |
| Pong                    | -4.52       | -4.92      | -12.28            | 6.18             | <b>10.94</b>     | -20.42            | 2.14              | -9.70             |
| PrivateEye              | 625.72      | 1,249.68   | 153.22            | 120.00           | 100.00           | 452.40            | 1,766.13          | <b>29,548.76</b>  |
| Qbert                   | 4,499.50    | 4,426.50   | 28,182.50         | 31,625.50        | 30,618.50        | 32,529.60         | 23,337.90         | <b>40,449.72</b>  |
| RoadRunner              | 17,326.00   | 20,580.00  | 86,650.00         | 49,828.00        | 57,212.00        | 38,764.81         | 43,813.29         | <b>87,953.53</b>  |
| Robotank                | 31.03       | 31.33      | 31.04             | <b>37.94</b>     | 36.16            | 15.66             | 9.68              | 10.63             |
| Seaquest                | 1,609.60    | 1,576.20   | 3,523.00          | 2,878.60         | 3,922.80         | <b>5,916.05</b>   | 559.28            | 867.51            |
| Skiing                  | -31,013.00  | -22,234.22 | -20,510.82        | -29,080.30       | -20,041.24       | -19,188.32        | <b>-13,852.04</b> | -15,417.86        |
| Solaris                 | 3,110.00    | 3,085.00   | <b>7,741.60</b>   | 3,106.40         | 4,704.00         | 3,048.78          | 1,832.93          | 3,524.69          |
| SpaceInvaders           | 2,592.40    | 2,622.50   | 3,447.40          | 3,680.40         | <b>4,289.40</b>  | 2,694.09          | 1,622.49          | 2,946.18          |
| StarGunner              | 17,510.00   | 17,597.56  | 18,340.00         | <b>20,700.00</b> | 20,320.00        | 1,381.24          | 1,642.82          | 1,864.64          |
| Tennis                  | <b>1.40</b> | -0.53      | -2.80             | 1.24             | 0.00             | -23.67            | -8.26             | -20.00            |
| TimePilot               | 24,455.00   | 24,342.50  | 22,780.00         | 24,950.00        | 24,150.00        | 16,099.92         | 11,126.86         | <b>34,610.25</b>  |
| Tutankham               | 159.40      | 154.86     | 184.94            | 181.48           | 203.54           | <b>216.67</b>     | 181.44            | 199.06            |
| UpNDown                 | 39,834.00   | 40,649.00  | 59,650.80         | 58,783.00        | 58,867.20        | <b>107,757.51</b> | 59,497.75         | 80,991.07         |
| Venture                 | 22.00       | 32.00      | <b>1,732.00</b>   | 1,466.00         | 1,564.00         | 0.00              | 15.68             | 10.73             |
| VideoPinball            | 136,531.50  | 138,748.35 | 148,995.14        | 134,489.58       | 139,799.22       | <b>514,012.51</b> | 387,308.60        | 184,720.01        |
| WizardOfWor             | 26,956.25   | 27,991.11  | 54,988.00         | 43,556.00        | 43,436.00        | <b>76,533.18</b>  | 30,383.68         | 12,027.43         |
| YarsRevenge             | 59,779.48   | 60,940.90  | 133,647.42        | 142,568.26       | 135,089.68       | 102,183.67        | 64,544.51         | <b>159,496.20</b> |
| Zaxxon                  | 9,342.00    | 9,520.00   | 28,102.00         | <b>33,268.00</b> | 30,818.00        | 22,905.73         | 10,159.01         | 21,135.58         |
| <b>Total times best</b> | <b>1</b>    | <b>0</b>   | <b>7</b>          | <b>10</b>        | <b>8</b>         | <b>12</b>         | <b>5</b>          | <b>10</b>         |

Table 2: Average scores with 90% confidence intervals over the set of 54 Atari Games. Algorithm scores that are the best according to the Welch’s t-test [2] using  $p < 0.1$  are highlighted in green.

| GAME                                           | RIW <sub>D</sub>         | RIW <sub>C</sub>        | CPL                                    | N-CPL <sub>D</sub>                    | N-CPL                                |
|------------------------------------------------|--------------------------|-------------------------|----------------------------------------|---------------------------------------|--------------------------------------|
| Alien                                          | 4,365.20±471.95          | 4,478.40±375.51         | 6,209.00±415.77                        | 7,640.60±615.52                       | 6,943.40±507.28                      |
| Amidar                                         | 1,014.84±70.76           | 897.00±70.28            | 1,433.68±123.49                        | <b>2,404.60±69.72</b>                 | 2,118.32±114.28                      |
| Assault                                        | 764.80±49.88             | 768.00±68.03            | 3,222.98±98.37                         | 3,185.44±123.18                       | 3,079.92±122.33                      |
| Asterix                                        | 52,940.00<br>±1,486.56   | 54,090.00<br>±1,323.40  | 39,860.00<br>±410.25                   | 48,364.00<br>±1,844.10                | 48,226.00<br>±1,184.51               |
| Asteroids                                      | 1,480.20±75.48           | 1,397.20±113.97         | 6,145.20±318.23                        | 9,000.80±143.15                       | 9,152.80±189.24                      |
| Atlantis                                       | 48,930.00<br>±4,017.54   | 46,464.00<br>±3,132.23  | <b>173,786.00</b><br><b>±2,343.28</b>  | 120,650.00<br>±892.42                 | 119,636.00<br>±830.95                |
| BankHeist                                      | 453.46±31.86             | 436.90±40.51            | 336.40±25.25                           | <b>957.12±105.73</b>                  | 709.00±76.09                         |
| BattleZone                                     | 102,780.00<br>±22,127.98 | 88,560.00<br>±16,866.49 | <b>220,680.00</b><br><b>±14,274.79</b> | 165,340.00<br>±28,612.76              | 153,880.00<br>±28,305.50             |
| BeamRider                                      | 4,124.37±384.99          | 3,521.80±371.92         | <b>6,164.64±287.17</b>                 | 3,743.80±466.05                       | 3,560.88±415.25                      |
| Berzerk                                        | 600.00±32.84             | 620.00±32.37            | 3,148.00±386.38                        | 4,642.20±367.59                       | 4,120.60±423.64                      |
| Bowling                                        | 65.38±1.66               | 63.10±2.00              | <b>161.06±5.46</b>                     | 101.40±3.22                           | 103.24±3.32                          |
| Boxing                                         | 52.44±2.00               | 54.58±2.86              | 80.96±2.63                             | 84.30±2.10                            | 86.40±0.97                           |
| Breakout                                       | 64.34±17.89              | 53.36±10.91             | 197.82±33.59                           | 320.64±8.03                           | 302.04±18.31                         |
| Centipede                                      | 52,685.12<br>±2,811.22   | 55,495.78<br>±1,398.86  | 53,608.80<br>±1,567.38                 | 60,157.38<br>±1,726.88                | <b>62,654.16</b><br><b>±1,107.16</b> |
| ChopperCommand                                 | 3,768.00±634.47          | 3,466.00±378.06         | <b>17,908.00±1,432.95</b>              | 4,570.00±602.78                       | 3,786.00±601.16                      |
| CrazyClimber                                   | 40,520.00<br>±550.63     | 39,387.50<br>±486.25    | 78,266.00<br>±3,572.79                 | 90,332.00<br>±2,414.91                | 91,912.00<br>±2,184.99               |
| DemonAttack                                    | 8,499.88±252.38          | 8,449.00±320.73         | 10,560.00±188.97                       | 10,829.90±274.19                      | 10,876.00±193.47                     |
| DoubleDunk                                     | 6.72±0.84                | 6.00±0.94               | 19.76±1.02                             | 23.76±0.15                            | <b>23.96±0.07</b>                    |
| Enduro                                         | 1.90±0.57                | 1.34±0.38               | 231.44±10.04                           | <b>250.88±8.23</b>                    | 220.28±9.71                          |
| FishingDerby                                   | -67.76±1.96              | -62.46±2.20             | -23.94±4.32                            | -29.22±4.30                           | <b>-7.62±5.99</b>                    |
| Freeway                                        | 5.50 ± 0.24              | 5.52 ± 0.28             | 28.86±0.45                             | 29.02 ± 0.45                          | 28.96 ± 0.30                         |
| Frostbite                                      | 280.00±4.56              | 273.80±3.72             | <b>9,956.80±1,066.62</b>               | 5,255.60±389.33                       | 6,508.00±588.79                      |
| Gopher                                         | 6,311.43±440.94          | 5,990.83±479.70         | 11,181.60±72.70                        | <b>13,326.40±240.79</b>               | 12,539.60±158.58                     |
| Gravitar                                       | 1,755.00±171.35          | 1,725.00±192.75         | 2,382.00±228.46                        | 2,246.00±201.67                       | 2,284.00±231.37                      |
| Hero                                           | 17,438.30<br>±1,011.92   | 17,159.70<br>±949.20    | 29,200.40<br>±1,804.42                 | 34,083.40<br>±938.86                  | <b>36,099.80</b><br><b>±553.32</b>   |
| IceHockey                                      | 21.48±0.73               | 21.92±0.83              | 19.62±1.09                             | <b>29.58±0.90</b>                     | 26.96±1.03                           |
| Jamesbond                                      | 2,378.00±1,224.25        | 2,485.00±1,210.76       | 18,666.00±598.37                       | 17,572.00±820.54                      | 18,790.00±907.58                     |
| Kangaroo                                       | 1,556.00±203.70          | 1,504.00±151.18         | 5,332.00±727.16                        | 9,222.00±546.79                       | 9,202.00±572.19                      |
| Krull                                          | 2,176.58±89.61           | 2,127.60±88.85          | <b>5,631.22±272.50</b>                 | 4,900.90±141.45                       | 4,422.88±149.38                      |
| KungFuMaster                                   | 5,668.00<br>±425.75      | 5,886.00<br>±521.52     | 27,288.00<br>±1,908.35                 | 43,520.00<br>±1,108.67                | 42,388.00<br>±643.13                 |
| MontezumaRevenge                               | 0.00±0.00                | 0.00±0.00               | 2.00±3.26                              | 0.00±0.00                             | 0.00±0.00                            |
| MsPacman                                       | 15,697.56<br>±1,148.98   | 15,729.28<br>±1,138.48  | 11,922.22<br>±1,044.99                 | 16,150.08<br>±1,064.72                | <b>18,285.18</b><br><b>±703.36</b>   |
| NameThisGame                                   | 6,247.50±98.52           | 6,145.25±91.49          | 8,287.40±117.61                        | 8,017.20±129.51                       | 8,339.40±109.81                      |
| Phoenix                                        | 4,992.80±242.42          | 4,912.60±262.97         | 6,616.40±316.44                        | 8,033.40±687.80                       | 8,777.40±776.53                      |
| Pitfall                                        | -44.86±22.53             | -62.66±26.84            | -0.48±0.78                             | -1.68±1.33                            | -0.42±0.52                           |
| Pong                                           | -4.52±1.49               | -4.92±1.28              | -12.28±1.29                            | 6.18±1.29                             | <b>10.94±1.22</b>                    |
| PrivateEye                                     | 625.72±685.72            | 1,249.68±938.31         | 153.22±22.74                           | 120.00±9.30                           | 100.00±0.00                          |
| Qbert                                          | 4,499.50±756.07          | 4,426.50±688.09         | 28,182.50±2,855.33                     | <b>31,625.50±406.22</b>               | 30,618.50±693.66                     |
| RoadRunner                                     | 17,326.00<br>±3,626.95   | 20,580.00<br>±3,760.02  | <b>86,650.00</b><br><b>±3,065.43</b>   | 49,828.00<br>±3,244.08                | 57,212.00<br>±4,094.90               |
| Robotank                                       | 31.03±1.16               | 31.33±1.33              | 31.04±0.63                             | <b>37.94±0.73</b>                     | 36.16±0.84                           |
| Seaquest                                       | 1,609.60±291.85          | 1,576.20±281.51         | 3,523.00±255.00                        | 2,878.60±285.43                       | <b>3,922.80±245.47</b>               |
| Skiing                                         | -31,013.00<br>±700.82    | -22,234.22<br>±872.31   | -20,510.82<br>±1,199.55                | -29,080.30<br>±1,034.25               | -20,041.24<br>±1,139.52              |
| Solaris                                        | 3,110.00±232.31          | 3,085.00±532.56         | <b>7,741.60±825.51</b>                 | 3,106.40±169.24                       | 4,704.00±615.29                      |
| SpaceInvaders                                  | 2,592.40±301.45          | 2,622.50±303.10         | 3,447.40±269.92                        | 3,680.40±310.85                       | <b>4,289.40±301.15</b>               |
| StarGunner                                     | 17,510.00±240.75         | 17,597.56±397.74        | 18,340.00±217.12                       | 20,700.00±178.37                      | 20,320.00±335.94                     |
| Tennis                                         | 1.40±1.53                | -0.53±1.52              | -2.80±0.93                             | 1.24±1.45                             | 0.00±1.51                            |
| TimePilot                                      | 24,455.00±615.53         | 24,342.50±544.82        | 22,780.00±839.59                       | 24,950.00±528.00                      | 24,150.00±670.57                     |
| Tutankham                                      | 159.40±4.77              | 154.86±4.86             | 184.94±4.59                            | 181.48±3.80                           | <b>203.54±4.82</b>                   |
| UpNDown                                        | 39,834.00±830.87         | 40,649.00±822.57        | 59,650.80±1,078.03                     | 58,783.00±604.10                      | 58,867.20±752.05                     |
| Venture                                        | 22.00±20.96              | 32.00±23.00             | <b>1,732.00±49.99</b>                  | 1,466.00±176.15                       | 1,564.00±149.66                      |
| VideoPinball                                   | 136,531.50<br>±8,459.01  | 138,748.35<br>±8,349.10 | 148,995.14<br>±8,492.72                | 134,489.58<br>±7,483.99               | 139,799.22<br>±7,019.84              |
| WizardOfWor                                    | 26,956.25<br>±2,793.49   | 27,991.11<br>±2,907.59  | <b>54,988.00</b><br><b>±1,906.42</b>   | 43,556.00<br>±4,275.90                | 43,436.00<br>±4,142.91               |
| YarsRevenge                                    | 59,779.48<br>±2,070.84   | 60,940.90<br>±2,234.00  | 133,647.42<br>±4,698.49                | <b>142,568.26</b><br><b>±3,934.50</b> | 135,089.68<br>±4,813.68              |
| Zaxxon                                         | 9,342.00<br>±944.44      | 9,520.00<br>±1,221.31   | 28,102.00<br>±1,264.90                 | <b>33,268.00</b><br><b>±1,192.32</b>  | 30,818.00<br>±1,722.99               |
| <b>Best algorithm<br/>(t-test, p &lt; 0.1)</b> | 0                        | 0                       | 11                                     | 9                                     | 9                                    |

Table 3: Comparison of experimental settings used for the results of the different algorithms. Note that the train budget includes all the simulator interactions used by the lookahead algorithms even though only a small fraction of simulator interactions are used for training the networks directly.

| Algorithm                                                                                                  | Frameskip | Max. ep. length (Frames) | Train Budget (Sim. Interactions) | Lookahead Budget (Sim. Interactions) | Starts                 | Loss of Life signal |
|------------------------------------------------------------------------------------------------------------|-----------|--------------------------|----------------------------------|--------------------------------------|------------------------|---------------------|
| <b>RIW<sub>D</sub>, RIW<sub>C</sub></b>                                                                    | 15        | 18,000                   | 0                                | 100                                  | -                      | No                  |
| <b>N-CPL<sub>D</sub>, N-CPL, CPL, <math>\pi</math>-IW, <math>\pi</math>-IW+, <math>\pi</math>-HIW(n,1)</b> | 15        | 18,000                   | $20 \times 10^6$                 | 100                                  | -                      | No                  |
| <b>DQN</b>                                                                                                 | 4         | 18,000                   | $50 \times 10^6$                 | NA                                   | Rand.no-ops            | Yes                 |
| <b>Rainbow</b>                                                                                             | 4         | 108,000                  | $50 \times 10^6$                 | NA                                   | Human and Rand. no-ops | Yes                 |

Table 4: Comparison of N-CPL with a Human player’s scores and the model-free RL algorithm DQN scores as reported by Mnih et al.[3]. Note that the experimental settings are different between N-CPL and DQN[3], in terms of training budget, frame skips, using no-op starts and loss of life signal, see Table 3 for a comparison of experimental settings.

| GAME              | Human            | DQN               | N-CPL             |
|-------------------|------------------|-------------------|-------------------|
| Alien             | 6,875.00         | 3,069.00          | <b>6,943.40</b>   |
| Amidar            | 1,676.00         | 739.50            | <b>2,118.32</b>   |
| Assault           | 1,496.00         | <b>3,359.00</b>   | 3,079.92          |
| Asterix           | 8,503.00         | 6,012.00          | <b>48,226.00</b>  |
| Asteroids         | <b>13,157.00</b> | 1,629.00          | 9,152.80          |
| Atlantis          | 29,028.00        | 85,641.00         | <b>119,636.00</b> |
| BankHeist         | <b>734.40</b>    | 429.70            | 709.00            |
| BattleZone        | 37,800.00        | 26,300.00         | <b>153,880.00</b> |
| BeamRider         | 5,775.00         | <b>6,846.00</b>   | 3,560.88          |
| Bowling           | <b>154.80</b>    | 42.40             | 103.24            |
| Boxing            | 4.30             | 71.80             | <b>86.40</b>      |
| Breakout          | 31.80            | <b>401.20</b>     | 302.04            |
| Centipede         | 11,963.00        | 8,309.00          | <b>62,654.16</b>  |
| ChopperCommand    | <b>9,882.00</b>  | 6,687.00          | 3,786.00          |
| CrazyClimber      | 35,411.00        | <b>114,103.00</b> | 91,912.00         |
| DemonAttack       | 3,401.00         | 9,711.00          | <b>10,876.00</b>  |
| DoubleDunk        | -15.50           | -18.10            | <b>23.96</b>      |
| Enduro            | <b>309.60</b>    | 301.80            | 220.28            |
| FishingDerby      | <b>5.50</b>      | -0.80             | -7.62             |
| Freeway           | 29.60            | <b>30.30</b>      | 28.96             |
| Frostbite         | 4,335.00         | 328.30            | <b>6,508.00</b>   |
| Gopher            | 2,321.00         | 8,520.00          | <b>12,539.60</b>  |
| Gravitar          | <b>2,672.00</b>  | 306.70            | 2,284.00          |
| Hero              | 25,763.00        | 19,950.00         | <b>36,099.80</b>  |
| IceHockey         | 0.90             | -1.60             | <b>26.96</b>      |
| Jamesbond         | 406.70           | 576.70            | <b>18,790.00</b>  |
| Kangaroo          | 3,035.00         | 6,740.00          | <b>9,202.00</b>   |
| Krull             | 2,395.00         | 3,805.00          | <b>4,422.88</b>   |
| KungFuMaster      | 22,736.00        | 23,270.00         | <b>42,388.00</b>  |
| MontezumaRevenge  | <b>4,367.00</b>  | 0.00              | 0.00              |
| MsPacman          | 15,693.00        | 2,311.00          | <b>18,285.18</b>  |
| NameThisGame      | 4,076.00         | 7,257.00          | <b>8,339.40</b>   |
| Pong              | 9.30             | <b>18.90</b>      | 10.94             |
| PrivateEye        | <b>69,571.00</b> | 1,788.00          | 100.00            |
| Qbert             | 13,455.00        | 10,596.00         | <b>30,618.50</b>  |
| Riverraid         | 13,513.00        | 8,316.00          | <b>22,111.20</b>  |
| RoadRunner        | 7,845.00         | 18,257.00         | <b>57,212.00</b>  |
| Robotank          | 11.90            | <b>51.60</b>      | 36.16             |
| Seaquest          | <b>20,182.00</b> | 5,286.00          | 3,922.80          |
| SpaceInvaders     | 1,652.00         | 1,976.00          | <b>4,289.40</b>   |
| StarGunner        | 10,250.00        | <b>57,997.00</b>  | 20,320.00         |
| Tennis            | -8.90            | -2.50             | <b>0.00</b>       |
| TimePilot         | 5,925.00         | 5,947.00          | <b>24,150.00</b>  |
| Tutankham         | 167.60           | 186.70            | <b>203.54</b>     |
| UpNDown           | 9,082.00         | 8,456.00          | <b>58,867.20</b>  |
| Venture           | 1,188.00         | 380.00            | <b>1,564.00</b>   |
| VideoPinball      | 17,298.00        | 42,684.00         | <b>139,799.22</b> |
| WizardOfWor       | 4,757.00         | 3,393.00          | <b>43,436.00</b>  |
| Zaxxon            | 9,173.00         | 4,977.00          | <b>30,818.00</b>  |
| # Games >human    |                  | 23 (47%)          | <b>37 (76%)</b>   |
| #Games >75% human |                  | 27 (55%)          | <b>40 (82%)</b>   |
| # Games Best      | 10 (20%)         | 8 (16%)           | <b>31 (63%)</b>   |

Table 5: Comparison of N-CPL with a Human player’s scores and the model-free RL algorithm Rainbow using human starts. Note that the experimental settings are different between N-CPL and Rainbow[4], in terms of the training budget, maximum episode length, frame skips, using human starts and loss of life signal, see Table 3 for a comparison of experimental settings.

| GAME              | Human        | Rainbow          | N-CPL            |
|-------------------|--------------|------------------|------------------|
| Alien             | 6875         | 6022.90          | <b>6943.40</b>   |
| Amidar            | 1676         | 202.80           | <b>2118.32</b>   |
| Assault           | 1496         | <b>14491.70</b>  | 3079.92          |
| Asterix           | 8503         | <b>280114.00</b> | 48226.00         |
| Asteroids         | <b>13157</b> | 2249.40          | 9152.80          |
| Atlantis          | 29028        | <b>814684.00</b> | 119636.00        |
| BankHeist         | 734.4        | <b>826.00</b>    | 709.00           |
| BattleZone        | 37800        | 52040.00         | <b>153880.00</b> |
| BeamRider         | 5775         | <b>21768.50</b>  | 3560.88          |
| Bowling           | <b>154.8</b> | 39.40            | 103.24           |
| Boxing            | 4.3          | 54.90            | <b>86.40</b>     |
| Breakout          | 31.8         | <b>379.50</b>    | 302.04           |
| Centipede         | 11963        | 7160.90          | <b>62654.16</b>  |
| ChopperCommand    | 9882         | <b>10916.00</b>  | 3786.00          |
| CrazyClimber      | 35411        | <b>143962.00</b> | 91912.00         |
| DemonAttack       | 3401         | <b>109670.70</b> | 10876.00         |
| DoubleDunk        | -15.5        | -0.60            | <b>23.96</b>     |
| Enduro            | 309.6        | <b>2061.10</b>   | 220.28           |
| FishingDerby      | 5.5          | <b>22.60</b>     | -7.62            |
| Freeway           | <b>29.6</b>  | 29.10            | 28.96            |
| Frostbite         | 4335         | 4141.10          | <b>6508.00</b>   |
| Gopher            | 2321         | <b>72595.70</b>  | 12539.60         |
| Gravitar          | <b>2672</b>  | 567.50           | 2284.00          |
| Hero              | 25763        | <b>50496.80</b>  | 36099.80         |
| IceHockey         | 0.9          | -0.70            | <b>26.96</b>     |
| Kangaroo          | 3035         | <b>10841.00</b>  | 9202.00          |
| Krull             | 2395         | <b>6715.50</b>   | 4422.88          |
| KungFuMaster      | 22736        | 28999.80         | <b>42388.00</b>  |
| MontezumaRevenge  | <b>4367</b>  | 154.00           | 0.00             |
| MsPacman          | 15693        | 2570.20          | <b>18285.18</b>  |
| NameThisGame      | 4076         | <b>11686.50</b>  | 8339.40          |
| Pong              | 9.3          | <b>19.00</b>     | 10.94            |
| PrivateEye        | <b>69571</b> | 1704.40          | 100.00           |
| Qbert             | 16455        | 18397.60         | <b>30618.50</b>  |
| RoadRunner        | 7845         | 54261.00         | <b>57212.00</b>  |
| Robotank          | 11.9         | <b>55.20</b>     | 36.16            |
| Seaquest          | <b>20182</b> | 19176.00         | 3922.80          |
| SpaceInvaders     | 1652         | <b>12629.00</b>  | 4289.40          |
| StarGunner        | 10250        | <b>123853.00</b> | 20320.00         |
| Tennis            | -8.9         | -2.20            | <b>0.00</b>      |
| TimePilot         | 5925         | 11190.50         | <b>24150.00</b>  |
| Tutankham         | 167.6        | 126.90           | <b>203.54</b>    |
| Venture           | 1188         | 45.00            | <b>1564.00</b>   |
| VideoPinball      | 17298        | <b>506817.20</b> | 139799.22        |
| WizardOfWor       | 4757         | 14631.50         | <b>43436.00</b>  |
| Zaxxon            | 9173         | 19658.00         | <b>30818.00</b>  |
| # Games >human    |              | 31 (67%)         | <b>34 (74%)</b>  |
| #Games >75% human |              | 36 (78%)         | <b>37 (80%)</b>  |
| # Games Best      | 7 (15%)      | <b>21(46%)</b>   | 18 (39%)         |

Table 6: Same as Table 5 but with Rainbow using random no-op starts.

| GAME              | Human        | Rainbow          | N-CPL            |
|-------------------|--------------|------------------|------------------|
| Alien             | 6875         | <b>9491.70</b>   | 6943.40          |
| Amidar            | 1676         | <b>5131.20</b>   | 2118.32          |
| Assault           | 1496         | <b>14198.50</b>  | 3079.92          |
| Asterix           | 8503         | <b>428200.30</b> | 48226.00         |
| Asteroids         | <b>13157</b> | 2712.80          | 9152.80          |
| Atlantis          | 29028        | <b>826659.50</b> | 119636.00        |
| BankHeist         | 734.4        | <b>1358.00</b>   | 709.00           |
| BattleZone        | 37800        | 62010.00         | <b>153880.00</b> |
| BeamRider         | 5775         | <b>16850.20</b>  | 3560.88          |
| Bowling           | <b>154.8</b> | 30.00            | 103.24           |
| Boxing            | 4.3          | <b>99.60</b>     | 86.40            |
| Breakout          | 31.8         | <b>417.50</b>    | 302.04           |
| Centipede         | 11963        | 8167.30          | <b>62654.16</b>  |
| ChopperCommand    | 9882         | <b>16654.00</b>  | 3786.00          |
| CrazyClimber      | 35411        | <b>168788.50</b> | 91912.00         |
| DemonAttack       | 3401         | <b>111185.20</b> | 10876.00         |
| DoubleDunk        | -15.5        | -0.30            | <b>23.96</b>     |
| Enduro            | 309.6        | <b>2125.90</b>   | 220.28           |
| FishingDerby      | 5.5          | <b>31.30</b>     | -7.62            |
| Freeway           | 29.6         | <b>34.00</b>     | 28.96            |
| Frostbite         | 4335         | <b>9590.50</b>   | 6508.00          |
| Gopher            | 2321         | <b>70354.60</b>  | 12539.60         |
| Gravitar          | <b>2672</b>  | 1419.30          | 2284.00          |
| Hero              | 25763        | <b>55887.40</b>  | 36099.80         |
| IceHockey         | 0.9          | 1.10             | <b>26.96</b>     |
| Kangaroo          | 3035         | <b>14637.50</b>  | 9202.00          |
| Krull             | 2395         | <b>8741.50</b>   | 4422.88          |
| KungFuMaster      | 22736        | <b>52181.00</b>  | 42388.00         |
| MontezumaRevenge  | <b>4367</b>  | 384.00           | 0.00             |
| MsPacman          | 15693        | 5380.40          | <b>18285.18</b>  |
| NameThisGame      | 4076         | <b>13136.00</b>  | 8339.40          |
| Pong              | 9.3          | <b>20.90</b>     | 10.94            |
| PrivateEye        | <b>69571</b> | 4234.00          | 100.00           |
| Qbert             | 16455        | <b>33817.50</b>  | 30618.50         |
| RoadRunner        | 7845         | <b>62041.00</b>  | 57212.00         |
| Robotank          | 11.9         | <b>61.40</b>     | 36.16            |
| Seaquest          | <b>20182</b> | 15898.90         | 3922.80          |
| SpaceInvaders     | 1652         | <b>18789.00</b>  | 4289.40          |
| StarGunner        | 10250        | <b>127029.00</b> | 20320.00         |
| Tennis            | -8.9         | <b>0.00</b>      | <b>0.00</b>      |
| TimePilot         | 5925         | 12926.00         | <b>24150.00</b>  |
| Tutankham         | 167.6        | <b>241.00</b>    | 203.54           |
| Venture           | 1188         | 5.50             | <b>1564.00</b>   |
| VideoPinball      | 17298        | <b>533936.50</b> | 139799.22        |
| WizardOfWor       | 4757         | 17862.50         | <b>43436.00</b>  |
| Zaxxon            | 9173         | 22209.50         | <b>30818.00</b>  |
| # Games >human    |              | <b>37 (80%)</b>  | 34 (74%)         |
| #Games >75% human |              | <b>38 (83%)</b>  | 37 (80%)         |
| # Games Best      | 6 (13%)      | <b>31(67%)</b>   | 10(22%)          |

Table 7: Mean with standard deviations of 20 RTDP vs Random episodes for the SMRF test. Bold domains are classified as having SMRF.

| GAME                    | RTDP             | Random         |
|-------------------------|------------------|----------------|
| Alien                   | 379.50 ± 180.1   | 135.00 ± 39.4  |
| Amidar                  | 30.90 ± 18.0     | 8.70 ± 15.8    |
| Assault                 | 139.65 ± 38.3    | 49.35 ± 27.6   |
| Asterix                 | 625.00 ± 91.5    | 155.00 ± 70.5  |
| Asteroids               | 397.50 ± 137.6   | 74.00 ± 42.0   |
| Atlantis                | 1350.00 ± 915.7  | 635.00 ± 979.9 |
| BankHeist               | 27.50 ± 20.7     | 3.50 ± 4.8     |
| BattleZone              | 3350.00 ± 2725.3 | 450.00 ± 669.0 |
| BeamRider               | 121.00 ± 30.7    | 50.60 ± 46.7   |
| Berzerk                 | 324.00 ± 109.4   | 102.50 ± 68.0  |
| <b>Bowling</b>          | 0.00 ± 0.0       | 0.00 ± 0.0     |
| Boxing                  | 12.90 ± 5.8      | -2.00 ± 4.1    |
| Breakout                | 3.10 ± 0.8       | 1.00 ± 0.7     |
| Centipede               | 2189.75 ± 226.5  | 548.85 ± 565.0 |
| ChopperCommand          | 790.00 ± 260.6   | 205.00 ± 120.3 |
| CrazyClimber            | 715.00 ± 127.6   | 395.00 ± 124.4 |
| DemonAttack             | 68.50 ± 9.6      | 29.50 ± 12.4   |
| DoubleDunk              | -0.20 ± 1.4      | -1.90 ± 1.3    |
| <b>Enduro</b>           | 0.15 ± 0.5       | 0.05 ± 0.2     |
| FishingDerby            | -1.70 ± 3.1      | -9.70 ± 3.0    |
| <b>Freeway</b>          | 0.00 ± 0.0       | 0.00 ± 0.0     |
| Frostbite               | 122.00 ± 21.1    | 23.50 ± 16.5   |
| <b>Gopher</b>           | 0.00 ± 0.0       | 0.00 ± 0.0     |
| Gravitar                | 177.50 ± 195.2   | 0.00 ± 0.0     |
| Hero                    | 2206.50 ± 886.9  | 36.25 ± 41.4   |
| IceHockey               | 0.80 ± 0.8       | -0.40 ± 0.8    |
| <b>Jamesbond</b>        | 15.00 ± 22.9     | 5.00 ± 15.0    |
| Kangaroo                | 100.00 ± 100.0   | 10.00 ± 43.6   |
| Krull                   | 104.50 ± 38.4    | 19.50 ± 18.8   |
| KungFuMaster            | 130.00 ± 145.3   | 5.00 ± 21.8    |
| <b>MontezumaRevenge</b> | 0.00 ± 0.0       | 0.00 ± 0.0     |
| MsPacman                | 396.50 ± 193.9   | 213.00 ± 163.7 |
| NameThisGame            | 138.00 ± 41.1    | 44.50 ± 35.3   |
| Phoenix                 | 346.00 ± 93.0    | 110.00 ± 66.8  |
| <b>Pitfall</b>          | 0.00 ± 0.0       | -1.10 ± 4.8    |
| Pong                    | -0.65 ± 1.4      | -3.30 ± 1.0    |
| <b>PrivateEye</b>       | 0.00 ± 0.0       | 4.75 ± 21.9    |
| Qbert                   | 606.25 ± 50.5    | 77.50 ± 125.5  |
| Riverraid               | 862.50 ± 210.2   | 321.50 ± 70.0  |
| <b>RoadRunner</b>       | 15.00 ± 65.4     | 5.00 ± 21.8    |
| Robotank                | 1.05 ± 0.7       | 0.30 ± 0.5     |
| Seaquest                | 73.00 ± 26.3     | 14.00 ± 15.6   |
| <b>Skiing</b>           | -1248.00 ± 0.0   | -1248.00 ± 0.0 |
| <b>Solaris</b>          | 0.00 ± 0.0       | 0.00 ± 0.0     |
| SpaceInvaders           | 130.75 ± 29.5    | 41.00 ± 25.6   |
| StarGunner              | 370.00 ± 95.4    | 60.00 ± 106.8  |
| Tennis                  | 0.10 ± 0.7       | -1.90 ± 0.9    |
| TimePilot               | 370.00 ± 134.5   | 105.00 ± 66.9  |
| Tutankham               | 17.85 ± 11.8     | 1.95 ± 4.8     |
| UpNDown                 | 1247.50 ± 465.4  | 272.00 ± 285.5 |
| <b>Venture</b>          | 0.00 ± 0.0       | 0.00 ± 0.0     |
| VideoPinball            | 5026.10 ± 1909.3 | 521.10 ± 365.4 |
| WizardOfWor             | 240.00 ± 156.2   | 30.00 ± 55.7   |
| YarsRevenge             | 5527.45 ± 2895.4 | 274.10 ± 315.1 |
| <b>Zaxxon</b>           | 20.00 ± 60.0     | 0.00 ± 0.0     |

## Additional Implementation Details

The code along with the experiment result files are available at <https://github.com/stefanotoole/N-CPL>.

Table 8: N-CPL hyperparameters.

| Lookahed Parameters                                           |                                   |
|---------------------------------------------------------------|-----------------------------------|
| Sim. Interactions Budget                                      | 100                               |
| Lookahead Horizon                                             | 100                               |
| Value and Policy Network Parameters                           |                                   |
| Batch size                                                    | 128                               |
| Learning Rate                                                 | $2.50 \times 10^{-4}$             |
| Epochs                                                        | 8                                 |
| Loss Function for Policy                                      | Categorical crossentropy          |
| Loss Function for Value Function                              | Huber                             |
| Discount factor used in TD Learning                           | 0.99                              |
| Time steps between target network updates (for value network) | 10,000                            |
| Interval size of learning schedule                            | $1 \times 10^6$ sim. interactions |

Table 8 shows the different hyperparameters of N-CPL along with the selected values used for the experiments. Due to computational restraints we could not tune the hyperparameters of N-CPL. For the lookahead parameters the simulator budget per time step was selected to be 100 to match the budget used by Junyent et al. [1]. The lookahead horizon is the maximum search depth allowed, that is the maximum number of actions allowed from the root node of the lookahead. For the value and policy network parameters both the batch size and number of epochs used affects the training time. We selected both the batch size and number of epochs such that the time spent training the networks using a single vCPU is around the same time as the planning steps of N-CPL. We used the same learning rate, loss function (for the value function) and discount factor for the TD learning as used by DQN [3]. Following Junyent et al.[5] we use a crossentropy loss function for the policy network. The interval size of the learning schedule dictates the size of the data set used to update the networks and how often to reject or accept parameter updates. The interval size of the learning schedule is illustrated in Figure 2 of the main paper to be of a size of N episodes. Instead of setting the interval size to be a set number of episodes we set it as  $1 \times 10^6$  simulator interactions.

## References

- [1] Miquel Junyent, Vicenç Gómez, and Anders Jonsson. Hierarchical width-based planning and learning. In *Proceedings of the International Conference on Automated Planning and Scheduling*, volume 31, pages 519–527, 2021.
- [2] B. L. Welch. The generalization of ‘student’s’ problem when several different population variances are involved. *Biometrika*, 34(1/2):28–35, 1947.
- [3] Volodymyr Mnih, Koray Kavukcuoglu, David Silver, Andrei A Rusu, Joel Veness, Marc G Bellemare, Alex Graves, Martin Riedmiller, Andreas K Fidjeland, Georg Ostrovski, et al. Human-level control through deep reinforcement learning. *Nature*, 518:529, 2015.
- [4] Matteo Hessel, Joseph Modayil, Hado Van Hasselt, Tom Schaul, Georg Ostrovski, Will Dabney, Dan Horgan, Bilal Piot, Mohammad Azar, and David Silver. Rainbow: Combining improvements in deep reinforcement learning. In *Proceedings of the AAAI Conference on Artificial Intelligence*, volume 32, 2018.
- [5] Miquel Junyent, Anders Jonsson, and Vicenc Gomez. Deep policies for width-based planning. In *Proc. of the Int’l Conf. in Automated Planning and Scheduling (ICAPS)*, 2019.
